# Supplementary material for: Acylated and unacylated ghrelin impair skeletal muscle atrophy in mice
Source: JCI journal article supplement (doi:10.1172/jci39920), 2013-01-02
Supplement: sd1 [file 1]

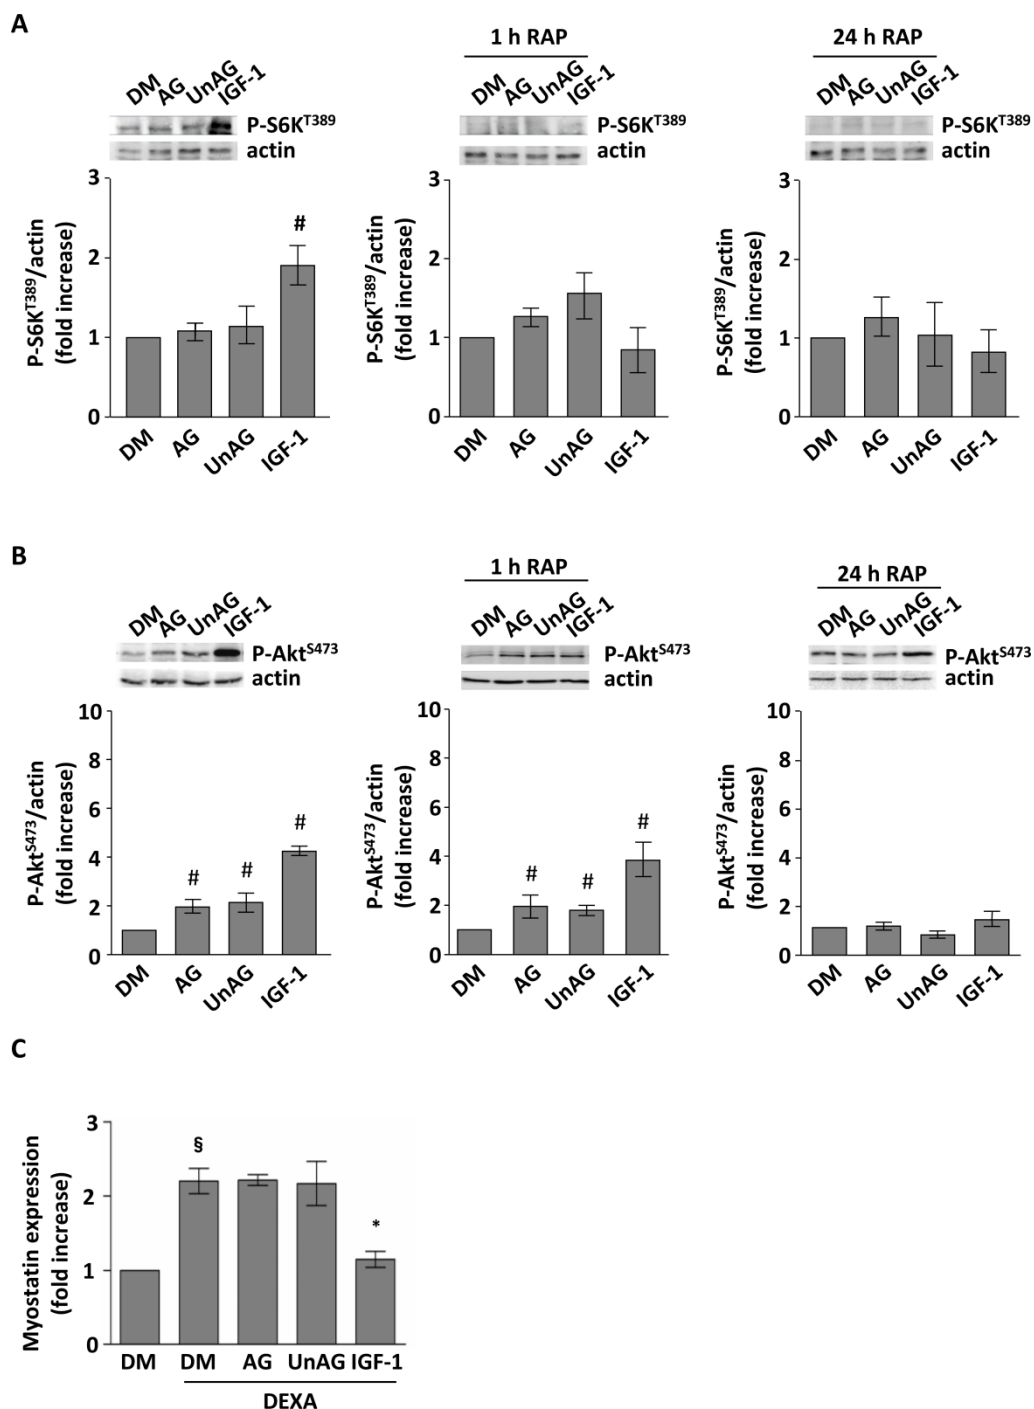

**Figure S1.**

Long rapamycin treatment impairs both mTORC1 and mTORC2 activities in C2C12 myotubes. (A-B) Phosphorylation of S6K<sup>T389</sup> and Akt<sup>S473</sup> detected by western blotting upon treatment for 20 min with 1  $\mu$ M AG or UnAG. Upper panels: representative blots; lower panels: quantifications of 3 independent experiments. Rapamycin (RAP) 20 ng/ml was used for 1 h or 24 h. After short rapamycin treatment (1 h), mTORC1-mediated phosphorylation of S6K<sup>T389</sup> is completely abolished (A), while the activity of mTORC2-mediated phosphorylation of Akt<sup>S473</sup> is spared (B). On the other hand, upon 24 h of rapamycin treatment, Akt<sup>S473</sup> phosphorylation is also abrogated, indicating that long rapamycin treatments affect mTORC2 activity as well as mTORC1 in C2C12 myotubes. #*P* < 0.05 versus control cells in DM.

(C) AG and UnAG do not affect dexamethasone (DEXA)-induced myostatin expression, measured by real-time RT-PCR. C2C12 myotubes were treated in DM for 24 h with 1  $\mu$ M DEXA in the presence or absence of 10 nM AG or UnAG, or 10 ng/ml IGF-1 and processed for myostatin expression analysis. §*P* < 0.01 versus control cells in DM; \**P* < 0.01 versus DEXA-treated cells.

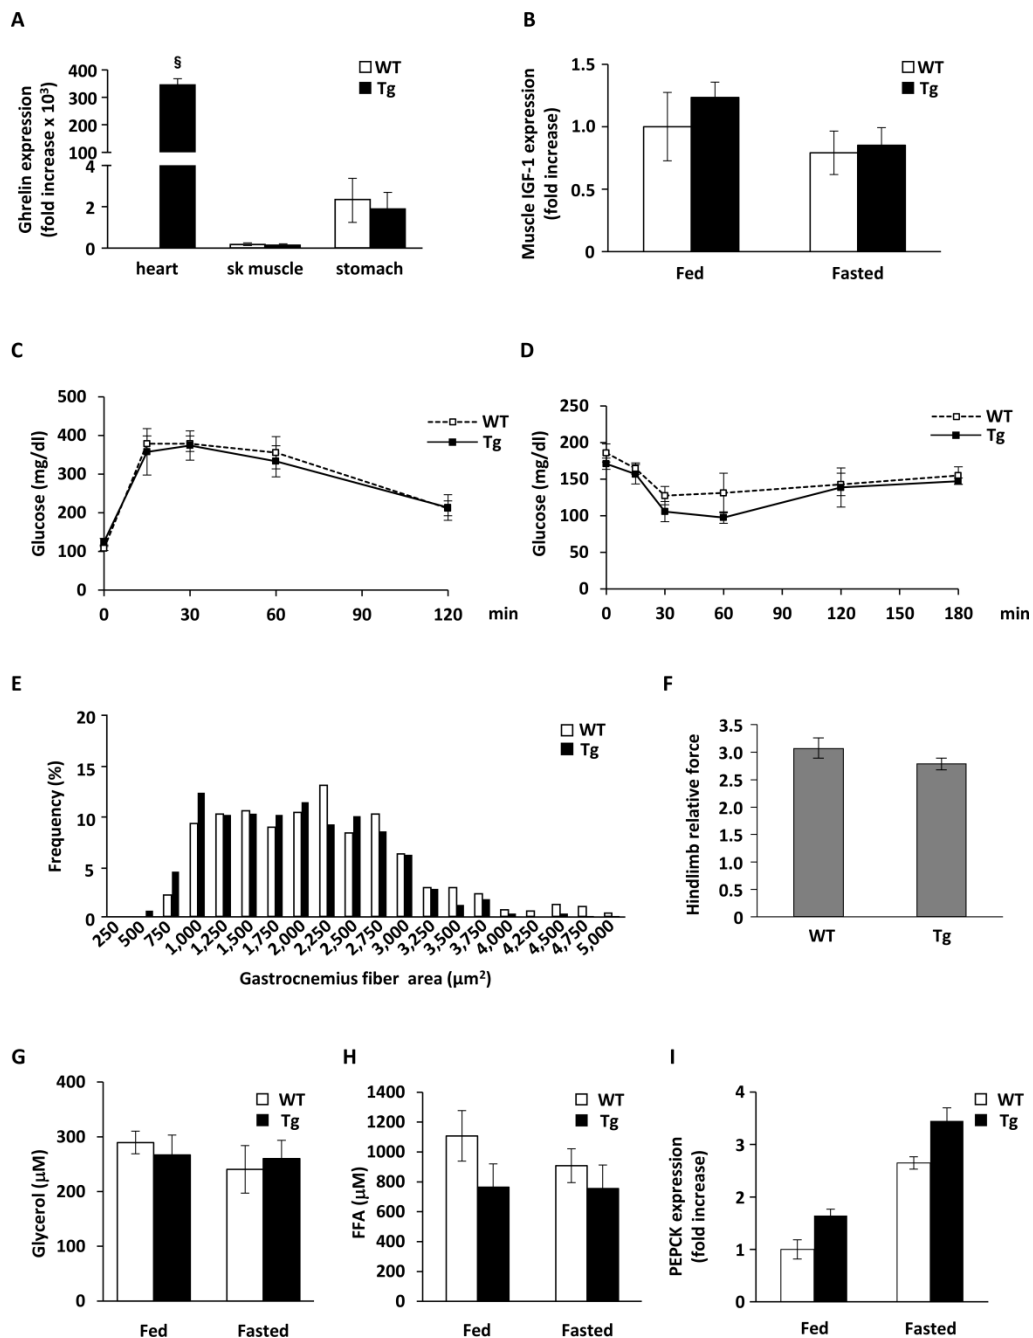

**Figure S2.**

(A) Ghrelin expression is specifically induced in the hearts of *Myh6/Ghrl* mice without any leaky expression in skeletal muscle. The expression in the stomach, the main source of AG and UnAG, is not altered in *Myh6/Ghrl* animals.  $\S P < 0.01$  versus WT mice. (B) IGF-1 expression in skeletal muscle is not altered in *Myh6/Ghrl* mice, either fed or starved animals (fed WT and Tg,  $n = 5$ ; starved WT,  $n = 5$ ; starved Tg,  $n = 6$ ). (C and D) *Myh6/Ghrl* mice do not feature significant differences in glucose uptake (C) and insulin resistance (D) compared to WT littermates. For the glucose tolerance test, mice were injected after 16 h of fasting (WT and Tg,  $n = 5$ ). (E and F) *Myh6/Ghrl* mice do not feature significant differences in muscle-fiber distribution and force compared to WT littermates. (E) Gastrocnemii were removed from fed animals and mean fiber CSA and distribution were analyzed (WT and Tg,  $n = 3$ ). Mean gastrocnemius CSA of fed animals  $\pm$  SEM ( $\mu\text{m}^2$ ) WT:  $2,165.65 \pm 290.85$ ; Tg:  $1,871.15 \pm 100.86$ . (F) The weight that WT and Tg animals managed to hold up before losing grip was measured through a Grip Meter device and normalized to the weight of animals (WT and Tg,  $n = 5$ ). (G-I) *Myh6/Ghrl* mice do not feature significant differences in plasmatic glycerol (G) and FFA (H), nor in liver PEPCK expression (I) compared to WT animals, in either fed or starved animals ( $n = 5$  for each group).

**A**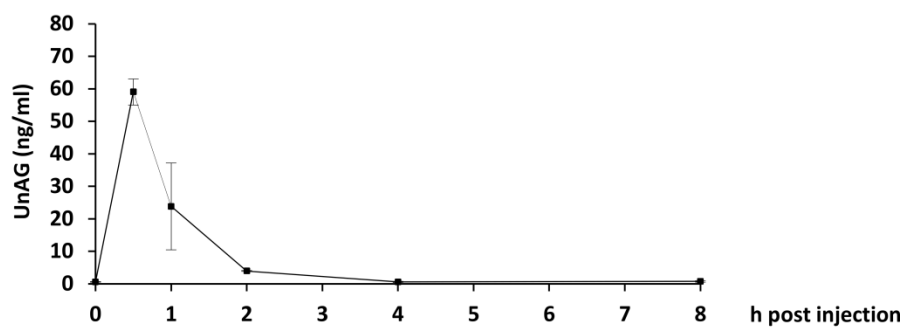**B**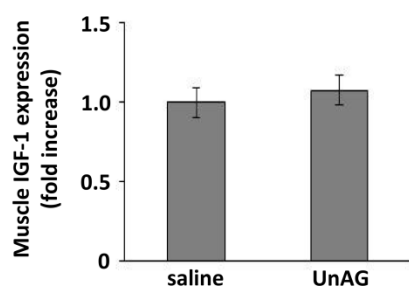**Figure S3.**

(A) UnAG plasma concentration upon UnAG treatment. WT mice ( $n = 2$ ) were injected s.c. with 100  $\mu\text{g/kg}$  UnAG and, at the indicated time points, blood samples were collected by retro-orbital puncture and processed for EIA determination of plasmatic UnAG concentration. Each sample was loaded in triplicates and mean values  $\pm$  SD are represented. (B) IGF-1 expression in skeletal muscle is not altered after UnAG injection compared to saline treatment ( $n = 5$  for each group).
